# Supplementary material for: A flame-retardant wood-based composite with magnesium–aluminium layered double hydroxides for efficient daytime radiative cooling
Source: Royal Society of Chemistry journal article supplement (doi:10.1039/d3ta06065a), 2023-12-18
Supplement: d3ta06065a1.pdf [file d3ta06065a1.pdf]

Electronic Supplementary Information (ESI)

**A flame-retardant wood-based composite with magnesium-aluminium  
layered double hydroxides for efficient daytime radiative cooling**

Guowei Li, Jiawei Huang, Jian Zhou, Yucheng Zhang, Chuchu Zhang, Zhenggang Rao \*,  
Linfeng Fei \*

*School of Physics and Materials Science, Jiangxi Engineering Laboratory for Advanced  
Functional Thin Films, and Jiangxi Key Laboratory for Two-Dimensional Materials,  
Nanchang University, Nanchang, Jiangxi 330031, China*

*\* Corresponding authors.*

*E-mail addresses: [feilinfeng@gmail.com](mailto:feilinfeng@gmail.com) (L. Fei); [raozhenggang@ncu.edu.cn](mailto:raozhenggang@ncu.edu.cn) (Z. Rao)*

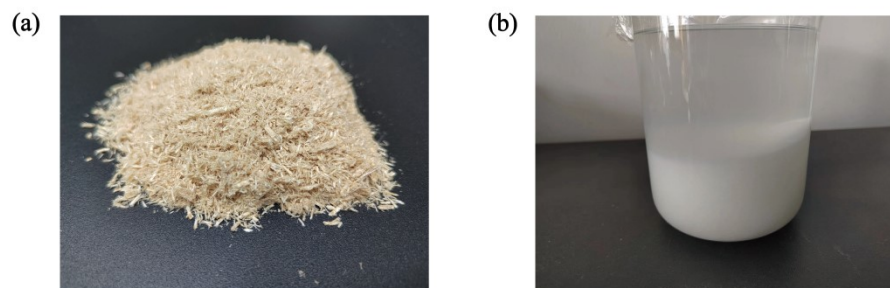

**Figure S1.** (a) Photograph for a pile of sawdust. (b) Photograph of lignocellulose dispersed in water.

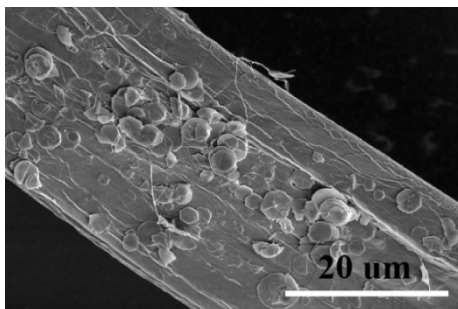

**Figure S2.** SEM image of MgAl-LDH nanoflakes loaded on a lignocellulose fiber.

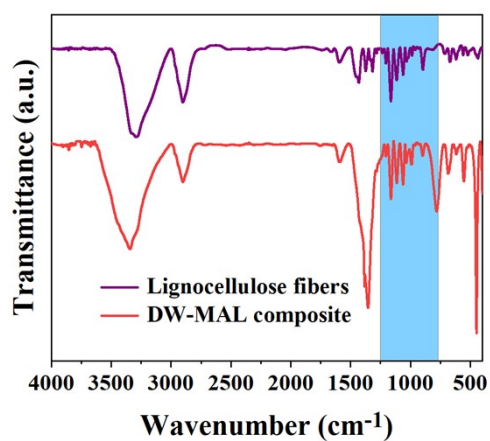

**Figure S3.** FTIR transmittance spectra of lignocellulose fibers and the DW-MAL composite. The absorption peaks observed at wavenumbers of  $784\text{ cm}^{-1}$  ( $\text{-OH}$ ) and  $1063\text{ cm}^{-1}$  ( $\text{CO}_3^{2-}$ ) are attributed to  $\text{MgAl-LDH}$  nanoflakes, while the peaks at  $894\text{ cm}^{-1}$  ( $\text{C-H}$ ),  $992\text{ cm}^{-1}$  ( $\text{C-O}$ ),  $1110\text{ cm}^{-1}$  ( $\text{C-H}$ ), and  $1160\text{ cm}^{-1}$  ( $\text{C-O-C}$ ) are associated with lignocellulose fibers.

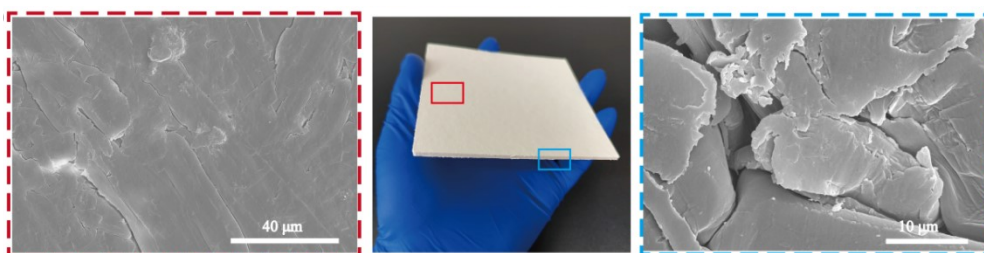

**Figure S4.** Frontview and sideview SEM images of a lignocellulose laminate.

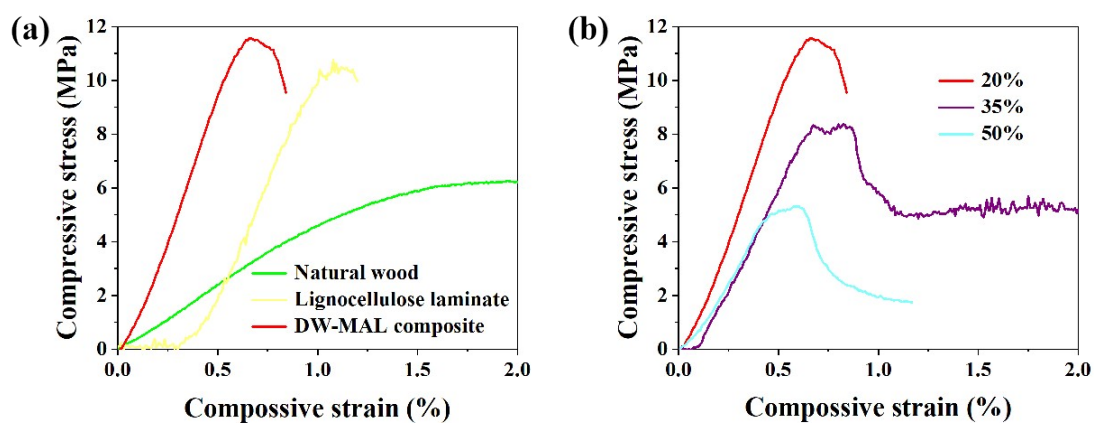

**Figure S5.** (a) Compressive stress-strain curves for natural wood, lignocellulose laminate and the DW-MAL composite. (b) Compressive stress-strain of the DW-MAL composite laminates with different MgAl-LDH contents.

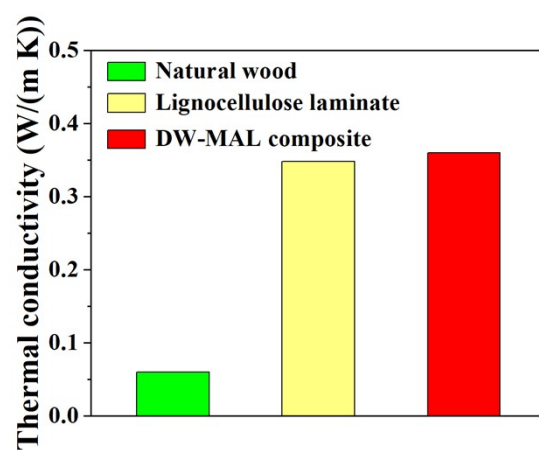

**Figure S6.** Comparison of thermal conductivities for natural wood laminate, lignocellulose laminate and the DW-MAL composite laminate.

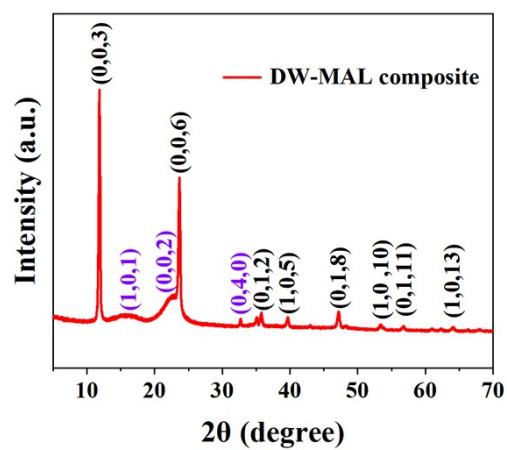

**Figure S7.** XRD pattern for the DW-MAL composite. The characteristic peaks marked in purple fonts belong to lignocellulose, while the peaks marked in black fonts belong to MgAl-LDHs.

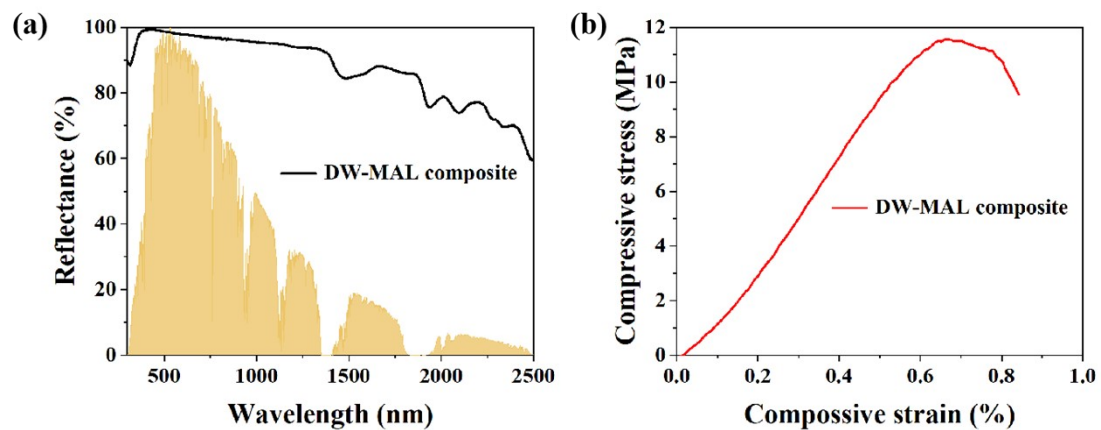

**Figure S8.** (a) Reflectance in solar spectrum for the DW-MAL composite after 6 months of storage. (b) Compressive stress-strain curve for the DW-MAL composite laminate after 6 months of storage.

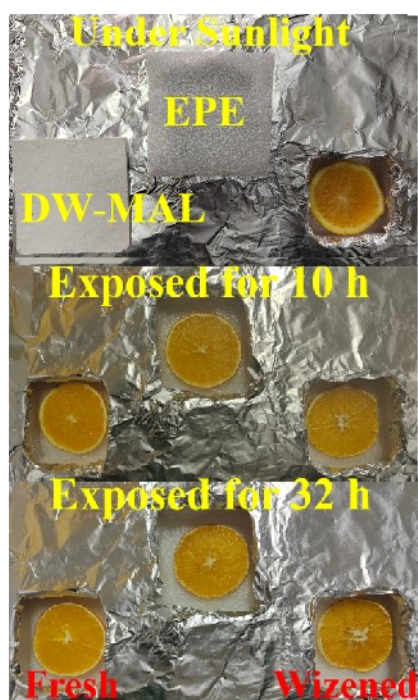

**Figure S9.** Orange preservations by the DW-MAL composite (the controlled groups were cover by a EPE foam or exposed to open air).

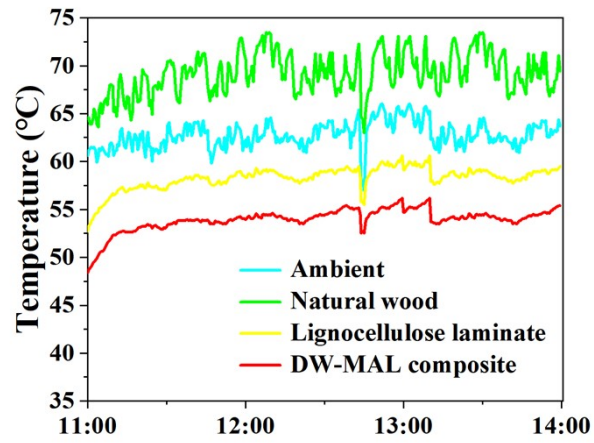

**Figure S10.** Comparative PDRC performance for natural wood, lignocellulose laminate, and the DW-MAL composite under sunlight. Be noted that this measurement was performed in another day as that of **Figure 3g**.

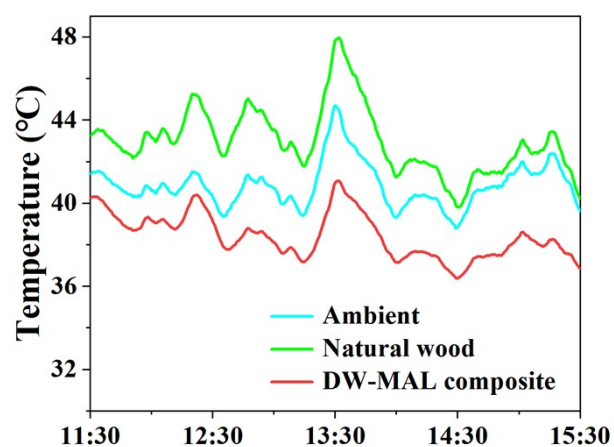

**Figure S11.** Comparative time-dependent surface temperature profiles for natural wood and the DW-MAL composite (tested after the removal of the topmost PE film as compared with **Figure 3g**).

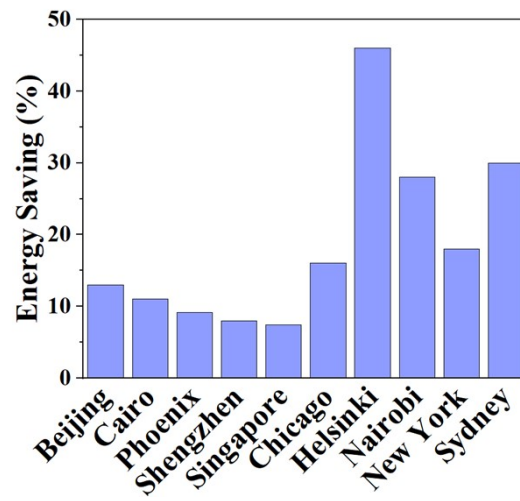

**Figure S12.** Building energy savings for ten representative cities around the world by using the DW-MAL composite.

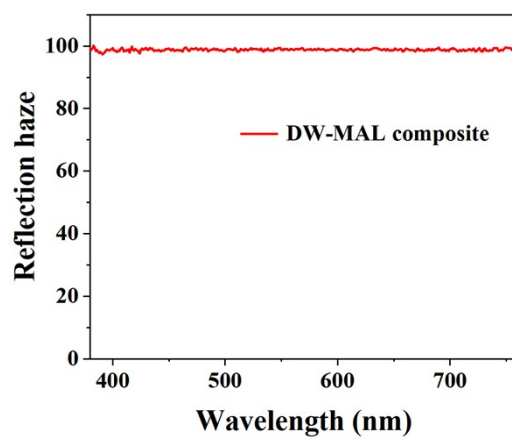

**Figure S13.** Reflection haze of the DW-MAL composite over visible wavelength.

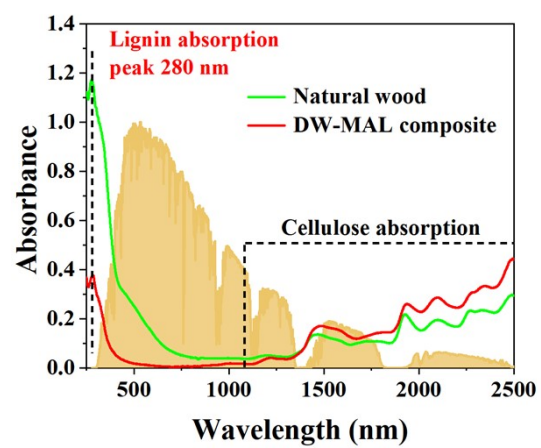

**Figure S14.** Absorbance v.s. wavelength profiles for the DW-MAL composite and natural wood.

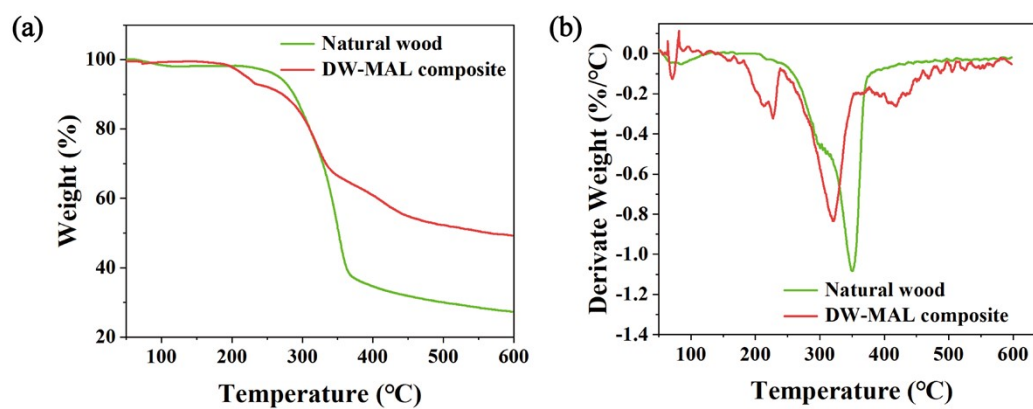

**Figure S15.** (a) TGA and (b) DTG profiles for natural wood and the DW-MAL composite. At the end of the thermal decomposition process, the DW-MAL composite retained a higher residual mass compared to natural wood.
